# Supplementary material for: Individual Differences in Dispositional Mindfulness Predict Attentional Networks and Vigilance Performance
Source: Springer Nature journal article supplement (doi:10.1007/s12671-022-01850-6), 2022-03-15
Supplement: MOESM1 [file 20223432]

**SUPPLEMENTARY MATERIAL S1:** Online ANTI-Vea – technical specifications

**Detailed task procedure** The ANTI-Vea is comprised by three types of trials: ANTI, EV, and AV. In ANTI trials, participants performed a flanker task: by pressing either “c” or “m”, they had to indicate the direction pointed by a central arrow (the target) while ignoring four distracting arrows appearing at its sides (the flankers). Stimuli was presented randomly either above or below the fixation point. To assess the control network, in half of the trials both the target and the flankers pointed to the same direction (congruent condition), whereas in the other half they pointed towards opposite directions (incongruent condition). To measure phasic alertness, in half of the trials a warning signal preceded the target (tone condition), whereas no warning signal was presented in the other half (no tone condition). Lastly, to assess the orienting network, participants were presented with a visual cue that could appear either at the same location than the arrows (valid condition, one third of trials), at the opposite location (invalid condition, one third of trials), or could not appear at all (no cue condition, one third of trials). In EV trials, the procedure was as for ANTI trials except for one difference: the target appeared upwardly or downwardly displaced from its usual position. Participants were instructed to remain vigilant to this vertical displacement, and to press the space bar when they detected it. Finally, in AV trials none of the above-mentioned stimuli was presented. Instead, the fixation point remained on the screen until a red millisecond countdown appeared. For these trials, participants were instructed to remain vigilant to the appearance of the counter, and to stop it as fast as possible by pressing any key.

The ANTI-Vea started with a practice phase, in which instructions were given so that participants could gradually familiarize with each type of trial. During this phase, participants were presented with four blocks comprised, respectively, of 16 ANTI trials (with visual feedback), 32 randomized trials (16 ANTI and 16 EV; with visual feedback), 48 randomized trials (24 ANTI, 8 EV and 8 AV; with visual feedback), and 40 randomized trials (24 ANTI, 8 EV and 8 AV; without visual feedback). Prior to begin with the experimental blocks, participants were invited to repeat the last practice block if needed. Lastly, six blocks of 80 randomized trials each (48 ANTI, 16 EV and 16 AV) were presented without visual feedback nor any break as the actual experimental task.

**Stimuli characteristics** The ANTI-Vea was designed and run with Javascript ES5, HTML5, CSS3, and Angular JS. In ANTI and EV trials, the stimuli were: a ~7 pixels (px) black cross as the fixation point; a ~13 px black asterisk as the visual cue; a 2000 Hz tone as the warning signal; and five black arrows of 50 px wide × 23 px high, separated horizontally from each other by ~63 px, as the target (central arrow) and the flankers (surrounding arrows). In EV trials, the target was vertically displaced by 8 px either upwards or downwards. Additionally, and to make more difficult the detection of displaced targets, a random variability of ±2 px was further applied to the vertical and horizontal locations of each arrow, for both ANTI (for target and flankers) and EV (only for flankers) trials. Concerning AV trials, the stimuli consisted of a millisecond countdown timer comprised by four red numbers of ~110 px height each (see also Fig. 1 in main text).

**SUPPLEMENTARY MATERIAL S2:** Items of the Spanish version of the Five Facets Mindfulness Questionnaire (FFMQ)

We used the Spanish version of the FFMQ as validated by Cebolla et al. (2012). The items of the scale were as follows:

1. *Cuando camino, noto deliberadamente las sensaciones de mi cuerpo al moverse.*
2. *Se me da bien encontrar las palabras para describir mis sentimientos.*
3. *Me critico a mí mismo/a por tener emociones irracionales o inapropiadas.*
4. *Percibo mis sentimientos y emociones sin tener que reaccionar a ellos.*
5. *Cuando hago algo, mi mente divaga y me distraigo fácilmente.*
6. *Cuando me ducho o me baño, estoy atento a las sensaciones del agua en mi cuerpo.*
7. *Con facilidad puedo poner en palabras mis creencias, sentimientos y expectativas.*
8. *No presto atención a lo que hago porque sueño despierto, porque me preocupo o porque me distraigo.*
9. *Observo mis sentimientos sin perderme en ellos.*
10. *Me digo a mi mismo/a que no debería sentir lo que siento.*
11. *Noto cómo los alimentos y las bebidas afectan a mis pensamientos, sensaciones corporales y emociones.*
12. *Me es difícil encontrar palabras para describir lo que siento.*
13. *Me distraigo fácilmente.*
14. *Creo que algunos de mis pensamientos no son normales o son malos y que no debería pensar así.*
15. *Presto atención a las sensaciones que produce el viento en el pelo o el sol en la cara.*
16. *Tengo problemas para pensar en las palabras que expresan correctamente cómo me siento.*
17. *Hago juicios sobre si mis pensamientos son buenos o malos.*
18. *Me es difícil permanecer centrado/a en lo que está sucediendo en el presente.*
19. *Cuando tengo pensamientos o imágenes perturbadoras, soy capaz de dar un paso atrás, y me doy cuenta del pensamiento o la imagen sin que me atrape.*
20. *Presto atención a sonidos como el tic-tac del reloj, el gorjeo de los pájaros o los coches que pasan.*
21. *En situaciones difíciles, puedo parar sin reaccionar inmediatamente.*
22. *Cuando tengo sensaciones en el cuerpo es difícil para mí describirlas, porque no puedo encontrar las palabras adecuadas.*
23. *Conduzco en “piloto automático”, sin prestar atención a lo que hago.*
24. *Cuando tengo pensamientos o imágenes perturbadoras, me calmo en poco tiempo.*
25. *Me digo a mi mismo/a que no debería pensar como pienso.*
26. *Percibo el olor y el aroma de las cosas.*
27. *Incluso cuando estoy muy enfadado, encuentro una forma de expresarlo con palabras.*
28. *Hago actividades precipitadamente sin estar de verdad atento/a a ellas.*
29. *Cuando tengo pensamientos o imágenes perturbadoras soy capaz de notarlas sin reaccionar.*
30. *Creo que algunas de mis emociones son malas o inapropiadas y que no debería sentirlas.*
31. *Percibo elementos visuales en la naturaleza o en el arte, como colores, formas, texturas o patrones de luces y sombras.*
32. *Mi tendencia natural es poner mis experiencias en palabras.*
33. *Cuando tengo pensamientos o imágenes perturbadoras, las noto y las dejo marchar.*
34. *Hago tareas automáticamente, sin ser consciente de lo que hago.*
35. *Cuando tengo pensamientos o imágenes perturbadoras, me juzgo como bueno o malo, dependiendo del contenido.*
36. *Presto atención a cómo mis emociones afectan a mis pensamientos y a mi conducta.*
37. *Normalmente puedo describir como me siento con considerable detalle.*
38. *Me sorprendo haciendo cosas sin prestar atención.*
39. *Me critico cuando tengo ideas irracionales.*

**SUPPLEMENTARY MATERIAL S3:** Items of the Spanish translation of the Attentional Control Scale (ACS)

We used the Spanish translation of the Attentional Control Scale as it has been used in other previous publications (e.g., Pacheco-Unguetti et al., 2011). The items of the scale were as follows:

1. *Me cuesta mucho concentrarme en tareas difíciles cuando hay mucho ruido.*
2. *Cuando necesito concentrarme y resolver problemas, tengo muchas dificultades para centrar mi atención.*
3. *Me distraigo con sucesos que ocurren a mi alrededor aunque esté trabajando intensamente en algo.*
4. *Mi concentración es buena aunque haya música en la misma habitación.*
5. *Cuando me concentro, puedo llegar a mantener tanto mi atención que no me doy cuenta de lo que ocurre a mi alrededor.*
6. *Cuando estoy leyendo o estudiando, me distraigo fácilmente si hay gente hablando en la misma habitación.*
7. *Cuando intento centrar mi atención en algo, tengo dificultades para impedir que surjan pensamientos distractores.*
8. *Me cuesta mucho concentrarme cuando estoy nervioso/a por algo.*
9. *Cuando estoy concentrado/a, no hago caso de las sensaciones de hambre o sed.*
10. *Puedo pasar rápidamente de una tarea a otra.*
11. *Me lleva mucho tiempo involucrarme en tareas nuevas.*
12. *Cuando estoy tomando apuntes en clase tengo dificultades para escuchar y escribir al mismo tiempo.*
13. *Cuando me interesa algo novedoso me implico en ello rápidamente.*
14. *Para mí es fácil leer o escribir mientras hablo por teléfono.*
15. *Tengo problemas para llevar dos conversaciones a la vez.*
16. *Tengo dificultad para encontrar ideas nuevas rápidamente.*
17. *Después de ser interrumpido/a o distraído/a, puedo dirigir mi atención fácilmente hacia lo que estaba haciendo y reanudarlo.*
18. *Cuando un pensamiento distractor me viene a la cabeza, me resulta fácil alejar mi atención de él e ignorarlo.*
19. *Fácilmente puedo alternar entre dos tareas diferentes.*
20. *Para mí es difícil cambiar la forma de pensar sobre algo y considerarlo desde otro punto de vista.*

**SUPPLEMENTARY MATERIAL S4:** Items of the Spanish translation of the Mind-Wandering Deliberate and Spontaneous scales (MW-D/MW-S)

We translated the MW-D and MW-S scales from the original English version (Carriere et al., 2013), as there is currently no such translation of the instrument to Spanish. The items and instructions were forward-translated and back-translated with the aid of a professional English translator who helped to resolve discrepancies between both translations. For both scales, instructions were: “Por favor, indica para las siguientes afirmaciones la respuesta que mejor refleja tu tendencia habitual a divagar mentalmente”. The items of the scales were as follows:

*MW-D:*

1. *Dejo a mis pensamientos divagar a propósito.*
2. *Disfruto dejando a mi mente divagar.*
3. *Dejar mi mente divagar me resulta una buena forma de lidiar con el aburrimiento.*
4. *Me permito ensimismarme en ensoñaciones agradables.*

*MW-S:*

1. *Me doy cuenta de que mis pensamientos divagan espontáneamente.*
2. *Cuando mi mente divaga, mis pensamientos tienden a saltar de una idea a otra.*
3. *Siento que no tuviera control sobre mi mente cuando divaga.*
4. *Mi mente divaga espontáneamente incluso cuando se supone que debería estar haciendo otra cosa.*

**SUPPLEMENTARY MATERIAL S5:** Assessing the vigilance decrement phenomenon in EV and AV measures

While previous research has shown the ANTI-Vea task to be sensitive to assess the vigilance decrement phenomenon (i.e., the decline in attentional performance *across* time on task), we decided to ascertain that the same classical decrement pattern was present in our own data. To that end, we analyzed the change in performance across the six blocks of the task for all EV and AV indices. By means of a series of repeated measures ANOVAs, EV decrement was observed as significant decrement in hits [*F*(5, 990) = 15.31, p < .001, ηp2 = 0.07], sensitivity (A’) [*F*(5, 980) = 4.63, p < .001, ηp2 = 0.02] and false alarms [*F*(5, 985) = 4.45, p < .001, ηp2 = 0.02], and a significant increment in response bias (B’’) [*F*(5, 980) = 6.93, p < .001, ηp2 = 0.03] across blocks. In turn, AV decrement was observed as a significant increment of reaction time (RT) [*F*(5, 990) = 16.45, p < .001, ηp2 = 0.08], standard deviation (SD) of RT [*F*(5, 990) = 7.33, p < .001, ηp2 = 0.04], and lapses [*F*(5, 990) = 15.31, p < .001, ηp2 = 0.07] across blocks. In line with what was expected, the results showed the vigilance decrement phenomenon in all EV and AV measures.

**SUPPLEMENTARY MATERIAL S6:** *P*-values for main correlations

| *P-Values for Kendall’s Tau Correlations Between Five Facets Mindfulness Questionnaire and Attentional Networks, Executive Vigilance, and Arousal Vigilance Outcomes* | | | | | | |
| --- | --- | --- | --- | --- | --- | --- |
|  | Five Facets Mindfulness Questionnaire | | | | | |
|  | Observe | Describe | Actaware | Nonjudge | Nonreact | Total |
| Attentional Networks |  |  |  |  |  |  |
| RT Overall | .118 | .385 | .367 | .268 | .006 | .043 |
| % Errors Overall | .581 | .125 | .458 | .396 | .006 | .047 |
| RT Alerting | .459 | .593 | .040 | .756 | .676 | .804 |
| % Errors Alerting | .517 | .586 | .033 | .817 | .545 | .709 |
| RT Orienting | .965 | .794 | .450 | .385 | .026 | .861 |
| % Errors Orienting | .674 | .384 | .187 | .096 | .629 | .102 |
| RT Control | .384 | .302 | .963 | .550 | .299 | .606 |
| % Errors Control | .496 | .425 | .895 | .750 | .874 | .829 |
| Executive Vigilance |  |  |  |  |  |  |
| % Hits | .921 | .146 | .386 | .579 | .412 | .394 |
| % Hits Slope | .434 | .612 | .712 | .190 | .758 | .448 |
| % FAs | .406 | .239 | .682 | .650 | .718 | .661 |
| % FAs Slope | .714 | .737 | .162 | .270 | .544 | .330 |
| A’ | .973 | .297 | .558 | .570 | .298 | .513 |
| A’ Slope | .440 | .468 | .599 | .277 | .368 | .332 |
| B’’ | .338 | .486 | .709 | .781 | .684 | .568 |
| B’’ Slope | .187 | .687 | .105 | .047 | .175 | .019 |
| Arousal Vigilance |  |  |  |  |  |  |
| RT Mean | .266 | .050 | .473 | .198 | .011 | .025 |
| RT Mean Slope | .357 | .458 | .740 | .822 | .206 | .907 |
| % Lapses | .478 | .019 | .834 | .214 | .026 | .027 |
| % Lapses Slope | .585 | .366 | .869 | .079 | .224 | .134 |
| SD of RT | .692 | .395 | .459 | .641 | .092 | .350 |
| SD of RT Slope | .978 | .500 | .930 | .322 | .185 | .285 |
| *Note*. *N* = 219. RT = Reaction time. FA = False alarm. SD = Standard deviation. | | | | | | |

**SUPPLEMENTARY MATERIAL S7:** Two-tailed correlational analyses

| *Kendall’s Tau Two-Tailed Correlations Between Five Facets Mindfulness Questionnaire and Attentional Networks, Executive Vigilance, and Arousal Vigilance Outcomes* | | | | | | |
| --- | --- | --- | --- | --- | --- | --- |
|  | Five Facets Mindfulness Questionnaire | | | | | |
|  | Observe | Describe | Actaware | Nonjudge | Nonreact | Total |
| Attentional Networks |  |  |  |  |  |  |
| RT Overall | −.055 | −.014 | −.016 | −.029 | −.118# | −.078 |
| % Errors Overall | .010 | −.054 | .005 | −.012 | −.118# | −.078 |
| RT Alerting | −.035 | .025 | .09# | −.014 | −.020 | .011 |
| % Errors Alerting | −.031 | −.026 | .101# | .011 | −.029 | .017 |
| RT Orienting | −.002 | .012 | −.035 | −.040 | .104# | −.008 |
| % Errors Orienting | −.020 | −.041 | −.062 | −.077 | −.023 | −.075 |
| RT Control | −.014 | −.024 | .083 | .006 | −.025 | .012 |
| % Errors Control | −.001 | −.009 | .058 | .031 | .054 | .044 |
| Executive Vigilance |  |  |  |  |  |  |
| % Hits | −.066 | .049 | .013 | −.009 | .010 | .012 |
| % Hits Slope | .008 | −.013 | −.026 | .041 | −.033 | .006 |
| % FAs | .011 | .033 | −.022 | −.018 | −.027 | −.019 |
| % FAs Slope | −.027 | −.030 | .046 | .029 | −.005 | .020 |
| A’ | −.090 | .025 | −.007 | −.008 | .025 | −.002 |
| A’ Slope | .007 | .004 | −.012 | .027 | .016 | .002 |
| B’’ | .045 | −.032 | .017 | .013 | .019 | .026 |
| B’’ Slope | −.042 | .023 | −.058 | −.078 | −.044 | −.096# |
| Arousal Vigilance |  |  |  |  |  |  |
| RT Mean | .052 | −.091 | −.033 | −.060 | −.119* | −.103* |
| RT Mean Slope | .043 | .034 | .015 | −.010 | −.059 | .005 |
| % Lapses | .034 | −.111* | .010 | −.059 | −.107* | −.103* |
| % Lapses Slope | .026 | −.042 | −.008 | −.082 | −.058 | −.070 |
| SD of RT | .018 | −.039 | .034 | −.022 | −.079 | −.043 |
| SD of RT Slope | .001 | −.031 | −.004 | −.046 | −.062 | −.049 |
| *Note*. *N* = 219. RT = Reaction time. FA = False alarm. SD = Standard deviation. Number sign (#) indicates correlations declared significant (*p* < .05) prior to Benjamini-Hochberg procedure. Asterisks (*) indicate correlations held significant after Benjamini-Hochberg procedure. All comparisons are two-tailed.  * *p* < .05; ** *p* < .01. | | | | | | |

**SUPPLEMENTARY MATERIAL S8:**  Separate correlational analyses for 1st half (blocks 1-3) and 2nd half of the ANTI-Vea task

| *Kendall’s Tau Correlations Between Five Facets Mindfulness Questionnaire and Attentional Networks for 1st Half (Blocks 1-3) and 2nd Half (Blocks 4-6) of the ANTI-Vea Task.* | | | | | | | | | | | | | |
| --- | --- | --- | --- | --- | --- | --- | --- | --- | --- | --- | --- | --- | --- |
|  | | Blocks 1-3 | | | | | | Blocks 4-6 | | | | | |
| Observe | Describe | Actaware | Nonjudge | Nonreact | Total | Observe | Describe | Actaware | Nonjudge | Nonreact | Total |
| RT Overall | *τb* | −.069 | −.022 | −.024 | −.017 | −.102# | −.082# | −.045 | −.009 | .001 | −.039 | −.129** | −.078# |
|  | *p* | .069 | .315 | .302 | .356 | .015 | .037 | .165 | .421 | .501 | .199 | .003 | .044 |
| % Errors Overall | *τb* | .030 | −.014 | −.033 | −.005 | −.087# | −.045 | .002 | −.078 | −.003 | −.030 | −.103# | −.090# |
|  | *p* | .732 | .384 | .243 | .457 | .036 | .172 | .520 | .050 | .478 | .260 | .016 | .027 |
| RT Alerting | *τb* | −0.45 | .029 | .134** | .012 | −.037 | .024 | −.008 | .014 | .013 | −.051 | −.011 | −.020 |
|  | *p* | .333 | .536 | .004 | .790 | .428 | .598 | .861 | .759 | .778 | .273 | .815 | .658 |
| % Errors Alerting | *τb* | −.047 | −.087 | .075 | −.010 | −.056 | −.025 | −.032 | .049 | .085 | .030 | .011 | .054 |
|  | *p* | .355 | .082 | .137 | .849 | .273 | .616 | .521 | .320 | .086 | .546 | .824 | .269 |
| RT Orienting | *τb* | −.035 | .049 | −.030 | −.021 | .110# | .012 | .027 | −.042 | −.050 | −.005 | .070 | −.021 |
|  | *p* | .457 | .292 | .520 | .649 | .018 | .791 | .565 | .366 | .278 | .921 | .136 | .648 |
| % Errors Orienting | *τb* | −.051 | −.009 | −.057 | −.074 | −.032 | −.071 | −.008 | −.071 | −.014 | −.077 | −.003 | −.070 |
|  | *p* | .293 | .854 | .235 | .123 | .512 | .140 | .864 | .134 | .776 | .106 | .951 | .140 |
| RT Control | *τb* | −.006 | −.038 | .085 | −.001 | −.025 | .008 | −.025 | −.029 | .057 | .010 | −.015 | −.002 |
|  | *p* | .452 | .207 | .966 | .489 | .300 | .570 | .295 | .268 | .891 | .587 | .378 | .481 |
| % Errors Control | *τb* | −.006 | .037 | .066 | .012 | .081 | .073 | .042 | −.054 | .021 | .030 | −.005 | −.003 |
|  | *p* | .453 | .785 | .920 | .602 | .956 | .941 | .816 | .124 | .670 | .741 | .459 | .474 |
| *Note*. *N* = 219. RT = Reaction time.  *τb =* Kendall’s Tau correlation. *p* = *p*-value. Number sign (#) indicates correlations declared significant (*p* < .05) prior to Benjamini-Hochberg procedure. Asterisks (*) indicate correlations held significant after Benjamini-Hochberg procedure.  * *p* < .05; ** *p* < .01. | | | | | | | | | | | | | |

The table above shows Kendall’s Tau correlations between attentional network indices and mindfulness facets, both during the first half (blocks 1 to 3) and second half (blocks 4 to 6) of the task. After correcting for multiple comparisons, two correlations remained significant. First, consistent with our main results, higher Nonreact scores predicted faster RT, particularly during the second half of the task (*τ*b = −.129, *p* = .003). Before correction, however, statistically significant correlations were found between Nonreact and both RT and error rate during the first and the second half of the task, which also parallels our main results. Note that small fluctuations are to be expected when splitting whole-task data into two parts. Particularly, since each part contains half of the data points that comprise the full task, their reliability is diminished along with the statistical power that they can achieve. Taken both the main findings and the present results together, our data suggest that while Nonreact seems to be related to global attentional performance in terms of RT and accuracy during the whole task, the effect appears especially strong for RT during the second half. This indicates that the advantage in processing speed of less reactive individuals tends to increase over time, likely because at later stages of the ANTI-Vea fatigue builds up and the task becomes increasingly aversive, which would entail less of a handicap for these participants as compared to more reactive ones.

Second, we also found that Actaware scores were positively correlated with the phasic alertness RT effect in the first half of the task (*τ*b = .134, *p* = .004). No effect was found for the same correlation in the second half, not even before correcting for multiple comparisons. This result seems to indicate that participants scoring high in Actaware might benefit more from the exogenous alerting sound to accelerate their response to the target. Interestingly, this effect appeared at the beginning of the task only, when, importantly, there were still high levels of vigilance. In turn, by the end of the task, when vigilance had diminished, the effect was lost. Although it might appear counterintuitive, this lack of correlation with the alerting effect in the second as compared to the first half of the task seems *not* to reflect impoverished performance—on the contrary, the pattern is consistent with evidence showing that high phasic alertness in the context of reduced endogenous vigilance does reflect suboptimal attentional performance. Such a pattern has been found in states of sleep deprivation (Roca et al., 2012) and when comparing the attentional performance of non-musicians with that of expert musicians (Román-Caballero et al., 2020). In both cases, impoverished attentional performance was characterized by low vigilance and high phasic alertness. Although future studies are warranted to establish the robustness of the pattern of effects found here (especially given the relatively low reliability of the RT phasic alertness index and the *post hoc* nature of these analyses), our results seem to suggest that participants with higher Actaware have a more efficient phasic alertness network, which would have manifested as faster responses after alerting tones but only the context of high vigilance states.

**SUPPLEMENTARY MATERIAL S9:** *p*-values for secondary correlations

| *P-Values for Kendall’s Tau Correlations Between Five Facets Mindfulness Questionnaire and ACS, MW-S, and MW-D.* | | | | | | |
| --- | --- | --- | --- | --- | --- | --- |
|  | Five Facets Mindfulness Questionnaire | | | | | |
|  | Observe | Describe | Actaware | Nonjudge | Nonreact | Total |
| ACS | .939 | <.001 | <.001 | <.001 | <.001 | <.001 |
| MWS | <.001 | .019 | <.001 | <.001 | .058 | <.001 |
| MWD | .002 | .788 | .004 | .406 | .116 | .781 |
| *Note*. *N* = 219. ACS = Attentional Control Scale. MW-S = Mind-Wandering Spontaneous. MW-D = Mind-Wandering Deliberate. | | | | | | |

**REFERENCES**

Carriere, J. S. A., Seli, P., & Smilek, D. (2013). Wandering in both mind and body: Individual differences in mind wandering and inattention predict fidgeting. *Canadian Journal of Experimental Psychology/Revue Canadienne de Psychologie Expérimentale*, *67*(1), 19–31. https://doi.org/10.1037/a0031438

Cebolla, A., García-Palacios, A., Soler, J., Guillen, V., Baños, R., & Botella, C. (2012). Psychometric properties of the Spanish validation of the Five Facets of Mindfulness Questionnaire (FFMQ). *The European Journal of Psychiatry*, *26*(2), 118–126. https://doi.org/10.4321/S0213-61632012000200005

Pacheco-Unguetti, A. P., Acosta, A., Marqués, E., & Lupiáñez, J. (2011). Alterations of the attentional networks in patients with anxiety disorders. *Journal of Anxiety Disorders*, *25*(7), 888–895. https://doi.org/10.1016/j.janxdis.2011.04.010

Roca, J., Fuentes, L. J., Marotta, A., López-Ramón, M. F., Castro, C., Lupiáñez, J., & Martella, D. (2012). The effects of sleep deprivation on the attentional functions and vigilance. *Acta Psychologica*, *140*(2), 164–176. https://doi.org/10.1016/j.actpsy.2012.03.007

Román-Caballero, R., Martín-Arévalo, E., & Lupiáñez, J. (2021). Attentional networks functioning and vigilance in expert musicians and non-musicians. *Psychological Research*, *85*(3), 1121–1135. https://doi.org/10.1007/s00426-020-01323-2
